# Supplementary material for: Alteration in mitochondrial Ca2+ uptake disrupts insulin signaling in hypertrophic cardiomyocytes
Source: PubMed Central journal article supplement (PMC4234850; doi:10.1186/s12964-014-0068-4), 2014-11-07

# Additional file 4: Figure S4.

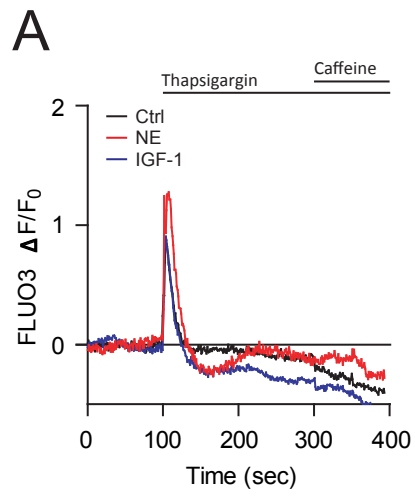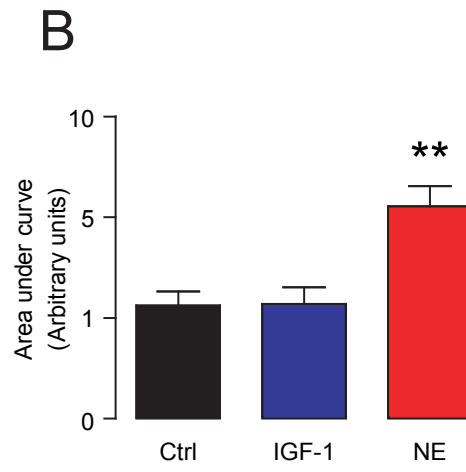

Supplement: 12964_2014_68_MOESM4_ESM.pdf [file 12964_2014_68_MOESM4_ESM.pdf]
